# Supplementary material
Source: publisher site journal article supplement (https://www.dovepress.com/article/190188)
Supplement: Supplementary file 1 [file get_supplementary_file.php]

**Figure S1**

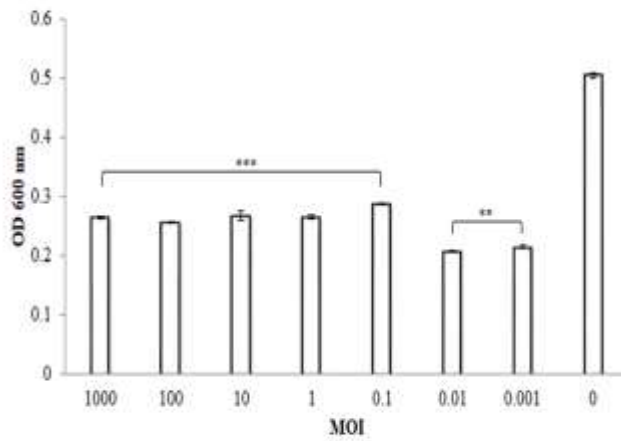

**Figure S1** MOI of SR  $\phi$  1. The absorbance is greatly reduced when MOI is 0.1 compared to control (MOI value of 0). \*\*\*  $p < 0.001$ ; \*\*  $p < 0.01$ . Each value is the mean  $\pm$  DS of 3 independent experiments. Statistical analysis was performed with Student's t test.

**Figure S2**

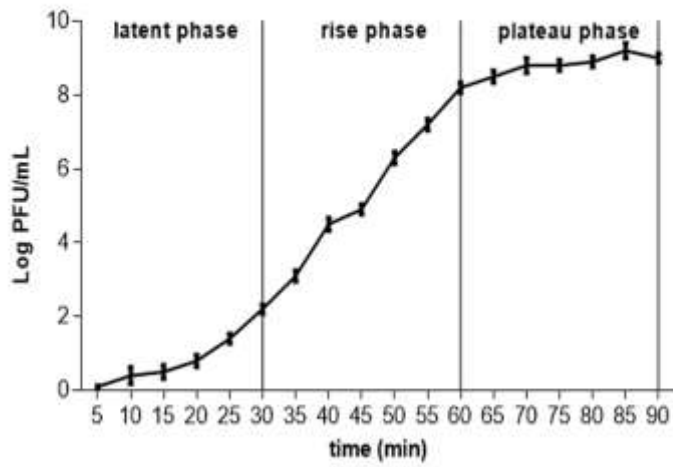

**Figure S2** One step growth curve of phage SR  $\phi$  1. Each value is the mean  $\pm$  DS of 3 independent experiments with 3 replicates each.

**Figure S3**

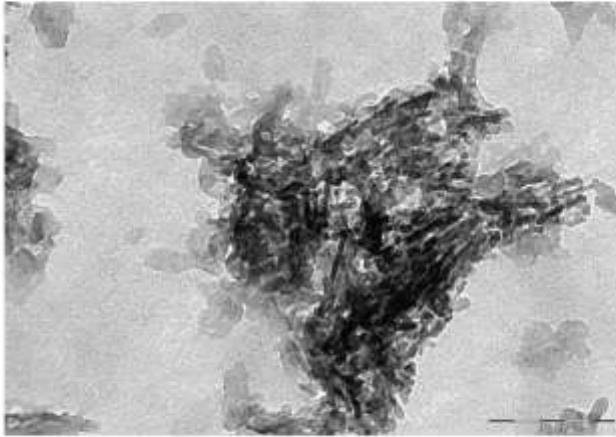

**Figure S3** Transmission electron microscope (TEM) analysis of the biomimetic hydroxyapatite.

Note: Scale bars, 100 nm.

**Figure S4**

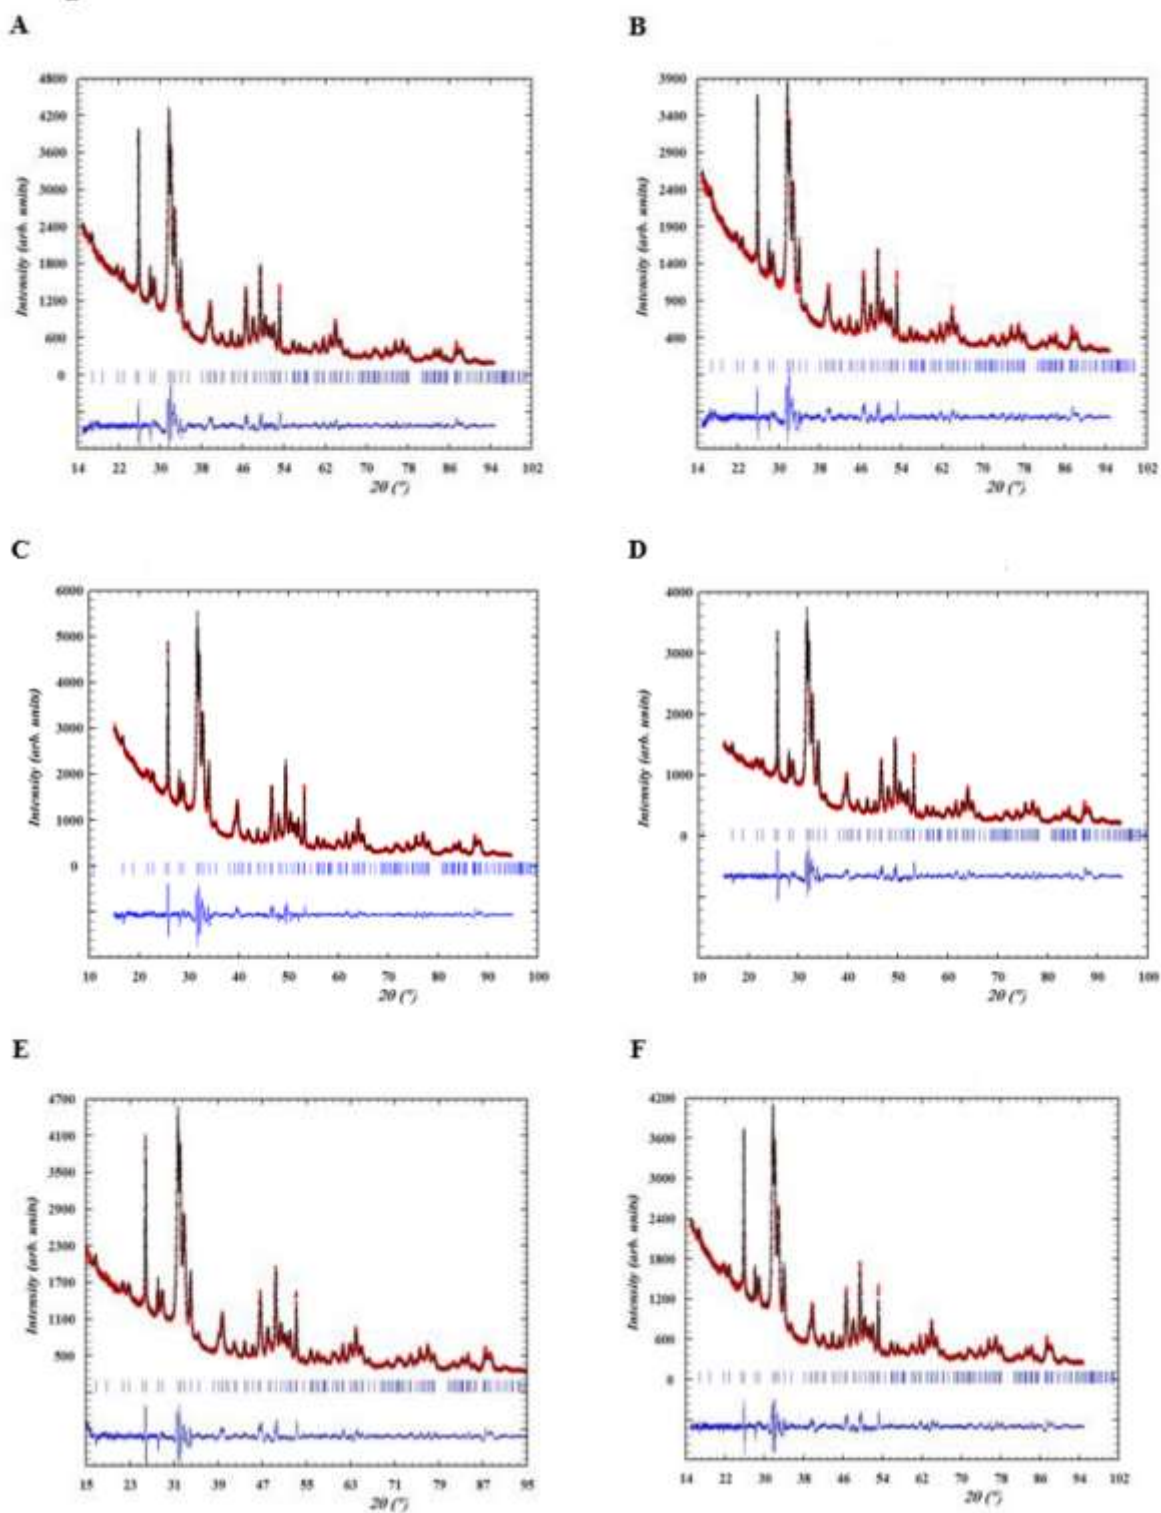

**Figure S4** XPD analysis. Rietveld fits of: (A) the HA\_10 mg sample; (B) Rietveld fits of the HA\_10 mg + SR  $\phi$ 1 sample; (C) Rietveld fits of the HA\_50 mg sample; (D) Rietveld fits of the HA\_50 mg + SR  $\phi$ 1 sample; (E) Rietveld fits of the HA\_100 mg sample; (F) Rietveld fits of the HA\_100 mg + SR  $\phi$ 1 sample.

**Figure S5**

**A**

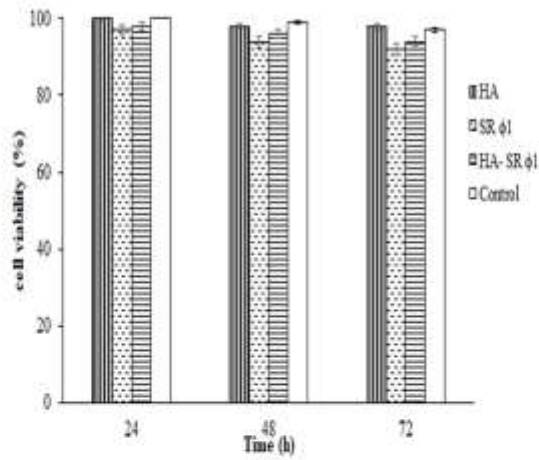

**B**

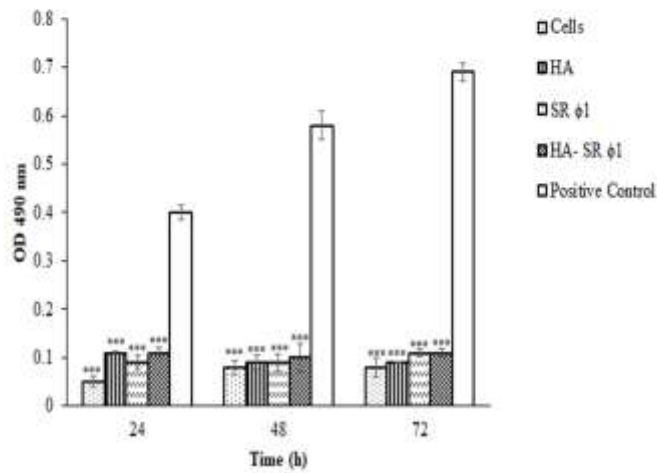

**Figure S5** Cytotoxicity trials of SR φ1, HA and HA- SR φ1 complex. **(A)** MTT and **(B)** LDH assays on HepG2 cell-line treated respectively with SR φ1 ( $10^7$  PFU/mL), HA- SR φ1 (100 mg/mL plus  $10^7$  PFU/mL) and HA (100 mg/mL) for 24 h, 48 h, 72 h. Each value is the mean  $\pm$  DS of 3 independent experiments with 3 replicates each. \*\*\*  $p < 0.001$ .

Note: Positive control for LDH assay was provided by the kit.

**Table S1** Predicted genes and gene products of pSs-1.

| Gene name                                                                                     | Range   |         | Bps size | Direction      |
|-----------------------------------------------------------------------------------------------|---------|---------|----------|----------------|
|                                                                                               | Minimum | Maximum |          |                |
| conserved hypothetical protein CDS                                                            | 34,417  | 34,770  | 354      | <i>reverse</i> |
| FIG00637995: hypothetical protein CDS                                                         | 13,871  | 14,041  | 171      | <i>forward</i> |
| FIG00638922: hypothetical protein CDS                                                         | 4,795   | 5,064   | 270      | <i>reverse</i> |
| FIG00642795: hypothetical protein CDS                                                         | 8,776   | 8,937   | 162      | <i>reverse</i> |
| FIG01045771: hypothetical protein CDS                                                         | 167     | 853     | 687      | <i>reverse</i> |
| FIG01045895: hypothetical protein CDS                                                         | 40,075  | 41,151  | 1,077    | <i>reverse</i> |
| FIG01046357: hypothetical protein CDS                                                         | 38,252  | 38,689  | 438      | <i>reverse</i> |
| FIG01047095: hypothetical protein CDS                                                         | 42,899  | 43,825  | 927      | <i>reverse</i> |
| FIG01047205: hypothetical protein CDS                                                         | 15,361  | 15,654  | 294      | <i>forward</i> |
| FIG01047296: hypothetical protein CDS                                                         | 38,777  | 39,139  | 363      | <i>reverse</i> |
| FIG01047895: hypothetical protein CDS                                                         | 37,869  | 38,255  | 387      | <i>reverse</i> |
| FIG01047943: hypothetical protein CDS                                                         | 47,650  | 48,147  | 498      | <i>reverse</i> |
| FIG01048207: hypothetical protein CDS                                                         | 35,712  | 36,242  | 531      | <i>reverse</i> |
| FIG01049728: hypothetical protein CDS                                                         | 24,102  | 25,076  | 975      | <i>reverse</i> |
| generated by GeneMarkS CDS                                                                    | 47,396  | 47,653  | 258      | <i>reverse</i> |
| gp5 CDS                                                                                       | 43,785  | 45,134  | 1,350    | <i>reverse</i> |
| gp7 CDS                                                                                       | 41,631  | 42,896  | 1,266    | <i>reverse</i> |
| gp8 CDS                                                                                       | 41,169  | 41,618  | 450      | <i>reverse</i> |
| HNH homing endonuclease CDS                                                                   | 49,814  | 50,332  | 519      | <i>reverse</i> |
| Holliday junction resolvase / Crossover junction endodeoxyribonuclease rusA (EC 3.1.22.-) CDS | 4,113   | 4,508   | 396      | <i>reverse</i> |
| hypothetical protein CDS                                                                      | 50,611  | 51,222  | 612      | <i>reverse</i> |
| hypothetical protein CDS                                                                      | 34,853  | 35,230  | 378      | <i>reverse</i> |
| hypothetical protein CDS                                                                      | 35,223  | 35,597  | 375      | <i>reverse</i> |
| hypothetical protein CDS                                                                      | 34,028  | 34,315  | 288      | <i>reverse</i> |
| hypothetical protein CDS                                                                      | 20,068  | 20,346  | 279      | <i>forward</i> |
| hypothetical protein CDS                                                                      | 49,318  | 49,590  | 273      | <i>reverse</i> |
| hypothetical protein CDS                                                                      | 15,829  | 16,083  | 255      | <i>forward</i> |
| hypothetical protein CDS                                                                      | 51,380  | 51,622  | 243      | <i>reverse</i> |
| hypothetical protein CDS                                                                      | 9,382   | 9,591   | 210      | <i>reverse</i> |
| hypothetical protein CDS                                                                      | 11,605  | 11,808  | 204      | <i>reverse</i> |
| hypothetical protein CDS                                                                      | 840     | 1,031   | 192      | <i>reverse</i> |
| hypothetical protein CDS                                                                      | 19,764  | 19,949  | 186      | <i>forward</i> |
| hypothetical protein CDS                                                                      | 14,038  | 14,220  | 183      | <i>forward</i> |
| hypothetical protein CDS                                                                      | 28,586  | 28,750  | 165      | <i>forward</i> |
| hypothetical protein CDS                                                                      | 10,338  | 10,469  | 132      | <i>forward</i> |
| hypothetical protein CDS                                                                      | 20,478  | 20,603  | 126      | <i>forward</i> |
| hypothetical protein CDS                                                                      | 2,453   | 2,566   | 114      | <i>forward</i> |
| Lysozyme (EC 3.2.1.17) CDS                                                                    | 48,821  | 49,318  | 498      | <i>reverse</i> |
| Mobile element protein CDS                                                                    | 21,489  | 22,340  | 852      | <i>forward</i> |
| ORF23 CDS                                                                                     | 10,523  | 11,566  | 1,044    | <i>forward</i> |
| Origin specific replication initiation factor CDS                                             | 7,968   | 8,789   | 822      | <i>reverse</i> |
| Phage anti-RecBCD 1 CDS                                                                       | 15,030  | 15,314  | 285      | <i>forward</i> |
| Phage antitermination protein N CDS                                                           | 12,140  | 12,523  | 384      | <i>forward</i> |

|                                                                            |        |        |       |                 |
|----------------------------------------------------------------------------|--------|--------|-------|-----------------|
| Phage antitermination protein Q CDS                                        | 2,672  | 3,190  | 519   | <i>reverse</i>  |
| Phage EaA protein CDS                                                      | 18,640 | 19,764 | 1,125 | <i>forward</i>  |
| Phage EaD protein CDS                                                      | 17,483 | 18,643 | 1,161 | <i>forward</i>  |
| Phage EaD protein CDS                                                      | 16,070 | 16,936 | 867   | <i>forward</i>  |
| Phage endopeptidase CDS                                                    | 48,357 | 48,824 | 468   | <i>reverse</i>  |
| Phage excisionase # Lambda family excisionase CDS                          | 21,074 | 21,292 | 219   | <i>forward</i>  |
| Phage head completion protein CDS                                          | 39,772 | 40,065 | 294   | <i>reverse</i>  |
| Phage holin, class II CDS                                                  | 2,005  | 2,208  | 204   | <i>reverse</i>  |
| Phage lysin (EC 3.2.1.17) # Phage lysozyme or muramidase (EC 3.2.1.17) CDS | 1,530  | 2,033  | 504   | <i>reverse</i>  |
| Phage minor tail protein CDS                                               | 22,793 | 24,091 | 1,299 | <i>,reverse</i> |
| Phage minor tail protein CDS                                               | 29,439 | 30,143 | 705   | <i>reverse</i>  |
| Phage minor tail protein CDS                                               | 30,872 | 31,219 | 348   | <i>reverse</i>  |
| Phage Nin protein CDS                                                      | 3,187  | 3,366  | 180   | <i>reverse</i>  |
| Phage NinB DNA recombination CDS                                           | 5,883  | 6,320  | 438   | <i>reverse</i>  |
| Phage NinE CDS                                                             | 5,570  | 5,746  | 177   | <i>reverse</i>  |
| Phage NinF CDS                                                             | 5,057  | 5,233  | 177   | <i>reverse</i>  |
| Phage NinH CDS                                                             | 3,347  | 3,550  | 204   | <i>reverse</i>  |
| Phage NinX CDS                                                             | 5,226  | 5,567  | 342   | <i>reverse</i>  |
| Phage outer membrane lytic protein Rz; Endopeptidase (EC 3.4.-.-) CDS      | 1,066  | 1,533  | 468   | <i>reverse</i>  |
| Phage protein CDS                                                          | 37,119 | 37,853 | 735   | <i>reverse</i>  |
| Phage protein CDS                                                          | 36,426 | 37,079 | 654   | <i>reverse</i>  |
| Phage protein CDS                                                          | 3,547  | 4,116  | 570   | <i>reverse</i>  |
| Phage protein CDS                                                          | 39,311 | 39,712 | 402   | <i>reverse</i>  |
| Phage protein CDS                                                          | 31,312 | 31,710 | 399   | <i>forward</i>  |
| Phage protein CDS                                                          | 20,590 | 20,964 | 375   | <i>forward</i>  |
| Phage protein CDS                                                          | 13,266 | 13,631 | 366   | <i>forward</i>  |
| Phage protein CDS                                                          | 17,193 | 17,486 | 294   | <i>forward</i>  |
| Phage protein CDS                                                          | 4,505  | 4,795  | 291   | <i>reverse</i>  |
| Phage protein CDS                                                          | 30,308 | 30,595 | 288   | <i>forward</i>  |
| Phage protein CDS                                                          | 30,600 | 30,860 | 261   | <i>reverse</i>  |
| Phage protein CDS                                                          | 6,301  | 6,513  | 213   | <i>reverse</i>  |
| Phage protein CDS                                                          | 39,123 | 39,311 | 189   | <i>reverse</i>  |
| Phage protein CDS                                                          | 15,665 | 15,832 | 168   | <i>forward</i>  |
| Phage replicative DNA helicase (EC 3.6.1.-) CDS                            | 6,595  | 7,971  | 1,377 | <i>reverse</i>  |
| Phage repressor CDS                                                        | 9,701  | 10,354 | 654   | <i>forward</i>  |
| Phage repressor CDS                                                        | 8,958  | 9,248  | 291   | <i>reverse</i>  |
| Phage tail assembly protein CDS                                            | 28,720 | 29,439 | 720   | <i>reverse</i>  |
| Phage tail assembly protein CDS                                            | 28,250 | 28,597 | 348   | <i>reverse</i>  |
| Phage tail fiber protein CDS                                               | 25,070 | 28,240 | 3,171 | <i>reverse</i>  |
| Phage tail length tape-measure protein 1 CDS                               | 31,711 | 33,966 | 2,256 | <i>reverse</i>  |
| Phage terminase, large subunit CDS                                         | 45,267 | 46,586 | 1,320 | <i>reverse</i>  |
| Phage terminase, small subunit CDS                                         | 46,570 | 47,001 | 432   | <i>reverse</i>  |
| Putative DNA-binding protein Erf CDS                                       | 14,323 | 15,030 | 708   | <i>forward</i>  |
| superinfection exclusion CDS                                               | 12,544 | 13,122 | 579   | <i>reverse</i>  |

**Abbreviation:** CDS, coding DNA sequences.

**Table S2** Cell parameters and space group of the hexagonal hydroxyapatite structure (ICSD code # 56306).

| HA                             |                               |                                |                    |
|--------------------------------|-------------------------------|--------------------------------|--------------------|
| <b>a (Å)</b>                   | <b>b (Å)</b>                  | <b>c (Å)</b>                   | <b>Space group</b> |
| 9.410                          | 9.410                         | 6.879                          | P63/m              |
| <b><math>\alpha</math> (°)</b> | <b><math>\beta</math> (°)</b> | <b><math>\gamma</math> (°)</b> |                    |
| 90                             | 90                            | 120                            |                    |



**Table S3** Cell parameters and domain size for HA, HA + SR  $\phi$ 1

|                                          | <b>a (Å)</b> | <b>b (Å)</b> | <b>c (Å)</b> | <b>App Size (nm) [002]</b> | <b>App Size (nm) [110]</b> |
|------------------------------------------|--------------|--------------|--------------|----------------------------|----------------------------|
| <b>HA_10 mg</b>                          | 9.434        | 9.434        | 6.885        | 42.4±0.5                   | 14.3±0.5                   |
| <b>HA_10 mg + SR <math>\phi</math>1</b>  | 9.434        | 9.434        | 6.885        | 46.0±0.5                   | 14.8±0.5                   |
| <b>HA_50 mg</b>                          | 9.434        | 9.434        | 6.885        | 42.9±0.5                   | 14.7±0.5                   |
| <b>HA_50 mg + SR <math>\phi</math>1</b>  | 9.434        | 9.434        | 6.885        | 41.7±0.5                   | 14.0±0.5                   |
| <b>HA_100 mg</b>                         | 9.434        | 9.434        | 6.885        | 42.9±0.5                   | 14.2±0.5                   |
| <b>HA_100 mg + SR <math>\phi</math>1</b> | 9.434        | 9.434        | 6.885        | 40.4±0.5                   | 13.7±0.5                   |
